# Supplementary material for: Impact of Antenatal SARS-CoV-2 Exposure on SARS-CoV-2 Neutralization Potency
Source: MDPI journal article supplement (doi:10.3390/vaccines12020164), 2024-02-05
Supplement: s1 [file s1]

## Supplementary Materials

Table S1. Comparison of maternal anti-S antibody concentration, cord anti-S antibody concentration, and response rate of neutralizing antibodies against Wuhan strain and Omicron variant, between participants receiving latest vaccine in different trimester.

| All participants ( <i>n</i> =75)                                       |                                 |                                 |                                    |                     |
|------------------------------------------------------------------------|---------------------------------|---------------------------------|------------------------------------|---------------------|
|                                                                        | T1 <sup>4</sup> ( <i>n</i> =25) | T2 <sup>5</sup> ( <i>n</i> =26) | T3 <sup>6</sup> ( <i>n</i> =24)    | <i>P</i> value      |
| Anti-S, maternal blood (U/mL) <sup>1</sup>                             | 578.50<br>(160.25-6425.00)      | 4565.00<br>(1749.00-10,213.25)  | 10,627.50<br>(6102.75-18,021.50)   | <0.001              |
| Anti-S, cord blood (U/mL)                                              | 576.10<br>(184.00-3757.00)      | 6017.00<br>(3838.75-11,717.25)  | 16,082.50<br>(10,805.50-19,823.75) | <0.001              |
| Maternal Wuhan (%) <sup>2</sup>                                        | 52.00 (38.46-97.51)             | 97.78 (96.13-98.15)             | 98.15 (98.05-98.22)                | <0.001              |
| Maternal Omicron (%) <sup>3</sup>                                      | 17.15 (8.36-73.17)              | 67.195 (44.46-85.09)            | 86.71 (65.02-93.69)                | <0.001              |
| Cord Wuhan (%)                                                         | 59.48 (47.25-97.74)             | 97.875 (97.42-98.24)            | 98.15 (98.01-98.22)                | <0.001              |
| Cord Omicron (%)                                                       | 22.50 (10.90-66.91)             | 79.18 (57.37-87.63)             | 89.12 (78.27-94.45)                | <0.001              |
| Control group: Participants without COVID-19 infection ( <i>n</i> =37) |                                 |                                 |                                    |                     |
|                                                                        | T1 <sup>4</sup> ( <i>n</i> =12) | T2 <sup>5</sup> ( <i>n</i> =14) | T3 <sup>6</sup> ( <i>n</i> =11)    | <i>P</i> value      |
| Anti-S <sup>1</sup> , maternal blood (U/mL)                            | 264.15<br>(56.60-1075.98)       | 2035.50<br>(1070.93-4912.75)    | 10,442.00<br>(9535.00-13,033.00)   | <0.001              |
| Anti-S, cord blood (U/mL)                                              | 269.80<br>(74.54-1819.75)       | 5937.50<br>(2932.33-11,280.75)  | 14,999.00<br>(12,085.00-19,042.00) | <0.001              |
| Maternal Wuhan (%) <sup>2</sup>                                        | 48.99 (24.82-91.00)             | 96.88 (84.49-97.91)             | 98.15 (98.04-98.19)                | <0.001              |
| Cord Wuhan (%)                                                         | 51.13 (29.51-97.45)             | 97.65 (97.10-98.25)             | 98.15 (98.04-98.22)                | <0.001              |
| Maternal Omicron (%) <sup>3</sup>                                      | 20.73 (15.64) <sup>7</sup>      | 50.53 (23.81) <sup>7</sup>      | 79.27 (14.71) <sup>7</sup>         | <0.001 <sup>7</sup> |
| Cord Omicron (%)                                                       | 19.88 (13.61-30.66)             | 76.45 (46.09-85.85)             | 88.94 (79.36-91.98)                | <0.001              |
| Case group: Participants with COVID-19 infection ( <i>n</i> =38)       |                                 |                                 |                                    |                     |
|                                                                        | T1 <sup>4</sup> ( <i>n</i> =13) | T2 <sup>5</sup> ( <i>n</i> =12) | T3 <sup>6</sup> ( <i>n</i> =13)    | <i>P</i> value      |
| Anti-S, maternal blood (U/mL)                                          | 6395.00<br>(348.35-27,936.50)   | 6076.50<br>(2630.50-25,784.25)  | 15,621.00<br>(5102.00-34,328.00)   | 0.564               |
| Anti-S, cord blood (U/mL)                                              | 1328.00<br>(332.55-30,385.00)   | 6219.50<br>(4186.25-26,469.00)  | 18,958.00<br>(8727.50-30,972.00)   | 0.231               |
| Maternal Wuhan (%)                                                     | 97.32 (39.16-98.21)             | 98.13 (97.30-98.21)             | 98.15 (97.90-98.30)                | 0.146               |
| Cord Wuhan (%)                                                         | 88.52 (56.86-98.13)             | 98.10 (97.50-98.23)             | 98.15 (97.72-98.21)                | 0.090               |
| Maternal Omicron (%) <sup>3</sup>                                      | 54.65 (42.02) <sup>7</sup>      | 78.78 (19.94) <sup>7</sup>      | 79.43 (19.61) <sup>7</sup>         | 0.064 <sup>7</sup>  |
| Cord Omicron (%)                                                       | 34.18 (7.99-96.91)              | 79.80 (61.23-96.44)             | 91.27 (71.35-96.64)                | 0.193               |

Notes: Data are shown as medians (interquartile ranges). Statistical significance was determined by the Kruskal-Wallis test.

<sup>1</sup>Concentration of anti-spike protein antibody concentration, U/mL.

<sup>2</sup>Response rate of neutralizing antibodies against Wuhan strain, %.

<sup>3</sup>Response rate of neutralizing antibodies against Omicron variant, %.

<sup>4</sup>T1, last vaccine before pregnancy and during first trimester

<sup>5</sup>T2, last vaccine in second trimester

<sup>6</sup>T3, last vaccine in third trimester

<sup>7</sup>Data are shown as means (standard deviation). Statistical significance was determined by ANOVA.

Abbreviation: COVID-19, coronavirus disease (COVID-19); Anti-S, anti-spike protein antibody.

Table S2. P-values for post-hoc multiple comparisons of maternal anti-S antibody concentration, cord anti-S antibody concentration, between participants receiving latest vaccine in different trimester

All participants ( $n=75$ )

|                               | T1 <sup>4</sup> -T2 <sup>5</sup> | T2-T3 <sup>6</sup> | T1-T3               |
|-------------------------------|----------------------------------|--------------------|---------------------|
| Maternal Anti-S <sup>1</sup>  | 0.019                            | 0.013              | <0.001              |
| Cord Anti-S                   | 0.002                            | 0.006              | <0.001              |
| Maternal Wuhan <sup>2</sup>   | 0.006                            | 0.01               | <0.001              |
| Cord Wuhan                    | <0.001                           | 0.173              | <0.001              |
| Maternal Omicron <sup>3</sup> | 0.005 <sup>†</sup>               | 0.14 <sup>†</sup>  | <0.001 <sup>†</sup> |
| Cord Omicron                  | <0.001                           | 0.048              | <0.001              |

Control group: Participants without COVID-19 infection ( $n=37$ )

|                  | T1-T2              | T2-T3              | T1-T3              |
|------------------|--------------------|--------------------|--------------------|
| Maternal Anti-S  | 0.002              | <0.001             | <0.001             |
| Cord Anti-S      | <0.001             | 0.006              | <0.001             |
| Maternal Wuhan   | 0.005              | <0.001             | <0.001             |
| Cord Wuhan       | 0.003              | 0.095              | <0.001             |
| Maternal Omicron | 0.143 <sup>†</sup> | 1.000 <sup>†</sup> | 0.115 <sup>†</sup> |
| Cord Omicron     | <0.001             | 0.009              | <0.001             |

Note: Statistical significance was determined by the Mann-Whitney U test after Kruskal-Wallis tests.

<sup>†</sup>Statistical significance was determined by the Bonferroni test after ANOVA tests.

<sup>1</sup>Concentration of Anti-S concentration, U/mL.

<sup>2</sup>Response rate of neutralizing antibodies against Wuhan strain, %.

<sup>3</sup>Response rate of neutralizing antibodies against Omicron variant, %.

<sup>4</sup>T1, last vaccine before pregnancy and during first trimester

<sup>5</sup>T2, last vaccine in second trimester

<sup>6</sup>T3, last vaccine in third trimester

Abbreviation: COVID-19, coronavirus disease (COVID-19); Anti-S, anti-spike protein antibody.

Table S3. Anti-spike protein receptor-binding domain concentrations in maternal and cord blood among maternal-infant dyads without COVID-19, with COVID-19 noted for  $\leq 7$  days, and with COVID-19 noted for  $> 7$  days.

| Variables                     | COVID-19                      |                                          |                                       | <i>P</i> value  |
|-------------------------------|-------------------------------|------------------------------------------|---------------------------------------|-----------------|
|                               | COVID-<br>( <i>n</i> =37)     | COVID+, $\leq 7$ days<br>( <i>n</i> =26) | COVID+, $> 7$ days<br>( <i>n</i> =12) |                 |
| Anti-S, maternal blood (U/mL) | 2070.00<br>(314.90-9706.00)   | 5833.00<br>(850.30-11,016.80)            | 29,256.50<br>(14,403.80-47,773.50)    | $<0.001^*$      |
| Anti-S, cord blood (U/mL)     | 5317.00<br>(545.60-12,393.50) | 6420.00<br>(612.10-16,190.50)            | 33,017.50<br>(5599.50-49,075.50)      | $0.008^\dagger$ |

Note:

\*Data are shown as means (standard deviation). Statistical significance was determined by One-way ANOVA.

$^\dagger$ Data are shown as medians (interquartile ranges). Statistical significance was determined by the Kruskal-Wallis test.

Abbreviation: COVID-19, coronavirus disease (COVID-19); Anti-S, anti-spike protein antibody.
